# Supplementary material for: A Risk-Assessing Signature Based on Hypoxia- and Immune-Related Genes for Prognosis of Lung Adenocarcinoma Patients
Source: Hindawi journal article supplement (doi:10.1155/2022/7165851), 2022-09-28
Supplement: f1 [file 7165851.f1.pdf]

| gene     | HR          | HR. 95L     | HR. 95H     | pvalue      |
|----------|-------------|-------------|-------------|-------------|
| LDHA     | 1.001256414 | 1.000906138 | 1.001606813 | 2.02E-12    |
| GAPDH    | 1.000192734 | 1.000122019 | 1.000263455 | 9.18E-08    |
| SLC2A1   | 1.001782801 | 1.001121227 | 1.002444813 | 1.26E-07    |
| PKM      | 1.001275939 | 1.000742192 | 1.00180997  | 2.77E-06    |
| KRT18    | 1.000232719 | 1.000133077 | 1.000332372 | 4.70E-06    |
| STC2     | 1.016576417 | 1.009343812 | 1.023860849 | 6.39E-06    |
| ITGA5    | 1.003066545 | 1.00172627  | 1.004408614 | 7.18E-06    |
| ANGPTL4  | 1.002158292 | 1.001194931 | 1.003122579 | 1.11E-05    |
| FKBP4    | 1.002647766 | 1.001366831 | 1.003930341 | 5.03E-05    |
| TH       | 1.24158424  | 1.11729656  | 1.379697638 | 5.80E-05    |
| PGAM1    | 1.010243721 | 1.005187472 | 1.015325403 | 6.86E-05    |
| GPI      | 1.002772508 | 1.001400292 | 1.004146604 | 7.41E-05    |
| TPI1     | 1.000666311 | 1.000334482 | 1.00099825  | 8.28E-05    |
| VEGFC    | 1.007570325 | 1.003782698 | 1.011372243 | 8.68E-05    |
| ENO1     | 1.000357239 | 1.000178555 | 1.000535955 | 8.90E-05    |
| ANXA2    | 1.001112657 | 1.000531958 | 1.001693694 | 0.000172363 |
| ADM      | 1.005010348 | 1.002356208 | 1.007671516 | 0.000211999 |
| DDIT4    | 1.001035937 | 1.000474267 | 1.001597923 | 0.000299437 |
| CD99     | 1.00242723  | 1.00109716  | 1.003759067 | 0.000345337 |
| NFKB2    | 1.007621286 | 1.003413565 | 1.011846653 | 0.000376463 |
| BIK      | 1.009161277 | 1.004075723 | 1.014272588 | 0.000403291 |
| SERPINE1 | 1.001205435 | 1.000532818 | 1.001878504 | 0.00044225  |
| PAICS    | 1.004544667 | 1.002006689 | 1.007089072 | 0.000442817 |
| PLOD2    | 1.002338942 | 1.001001669 | 1.003678002 | 0.000604096 |
| SLC16A1  | 1.003820933 | 1.001542662 | 1.006104387 | 0.001003201 |
| ALDOA    | 1.000436191 | 1.000175635 | 1.000696815 | 0.001032847 |
| HSPD1    | 1.001198672 | 1.000474974 | 1.001922893 | 0.001165916 |
| BCL2L1   | 1.002990678 | 1.001143308 | 1.004841458 | 0.00149957  |
| XRCC6    | 1.001696548 | 1.000613341 | 1.002780928 | 0.002135658 |
| IGFBP3   | 1.000627895 | 1.000225198 | 1.001030753 | 0.002240344 |
| COL4A5   | 1.020027725 | 1.007004896 | 1.033218967 | 0.002488584 |
| HLA-DQB1 | 0.998807624 | 0.998018528 | 0.999597344 | 0.003089423 |
| HERPUD1  | 0.995534677 | 0.992554148 | 0.998524156 | 0.003440191 |
| TPBG     | 1.011797717 | 1.003736245 | 1.019923935 | 0.004057046 |
| MIF      | 1.002013046 | 1.000629307 | 1.003398699 | 0.004341398 |
| IGFBP1   | 1.001835252 | 1.000568719 | 1.003103388 | 0.004499119 |
| GBE1     | 1.011384731 | 1.003389091 | 1.019444085 | 0.005182811 |
| TGFBI    | 1.000614501 | 1.000183201 | 1.001045987 | 0.005226278 |
| TXN      | 1.000354426 | 1.000099977 | 1.00060894  | 0.006329566 |
| KRT19    | 1.00017812  | 1.000048695 | 1.000307561 | 0.006987272 |
| PPAT     | 1.013689127 | 1.003534532 | 1.023946474 | 0.00812504  |
| P4HA1    | 1.001942481 | 1.000502313 | 1.003384722 | 0.008187494 |
| CDK1     | 1.004958488 | 1.001255519 | 1.008675151 | 0.008635664 |
| ERRFI1   | 1.000610482 | 1.000152196 | 1.001068978 | 0.00902606  |
| SLC20A1  | 1.004627008 | 1.001142165 | 1.008123981 | 0.009218808 |
| SLC3A2   | 1.002675634 | 1.00065648  | 1.004698863 | 0.009375436 |
| LOX      | 1.004714183 | 1.001150736 | 1.008290315 | 0.009476144 |
| SLC6A8   | 1.005169291 | 1.001194187 | 1.009160177 | 0.010763344 |
| PNP      | 1.005043521 | 1.001107555 | 1.008994962 | 0.01197519  |
| SIAH2    | 1.007931563 | 1.001718016 | 1.014183653 | 0.01227875  |

|           |             |             |             |             |
|-----------|-------------|-------------|-------------|-------------|
| NT5E      | 1.001884226 | 1.000385123 | 1.003385576 | 0.013741263 |
| UMPS      | 1.024923944 | 1.004776504 | 1.045475374 | 0.015082605 |
| RELA      | 1.008202773 | 1.001471235 | 1.014979557 | 0.01684447  |
| PDGFB     | 1.009246065 | 1.001566748 | 1.016984262 | 0.018192114 |
| AK2       | 0.994824744 | 0.990550097 | 0.999117839 | 0.018193238 |
| CCT6A     | 1.000371717 | 1.000061997 | 1.000681533 | 0.018654575 |
| PGK1      | 1.000574258 | 1.000056156 | 1.001092629 | 0.029820893 |
| HK2       | 1.002860305 | 1.000222842 | 1.005504723 | 0.03351994  |
| P4HA2     | 1.006826252 | 1.000466072 | 1.013226864 | 0.03537153  |
| HGF       | 0.964793862 | 0.932684883 | 0.998008238 | 0.037948097 |
| CDKN1A    | 1.001775583 | 1.000074273 | 1.003479787 | 0.040795262 |
| PSMA3     | 1.003011823 | 1.000112787 | 1.005919261 | 0.041717093 |
| PGM1      | 1.003612864 | 1.000107858 | 1.007130154 | 0.043343365 |
| HSPH1     | 1.005265903 | 1.000135493 | 1.010422629 | 0.044234436 |
| F3        | 1.000586146 | 1.000010623 | 1.001162    | 0.045917276 |
| CXCL5     | 1.002944841 | 1.00190101  | 1.00398976  | 3.12E-08    |
| S100A16   | 1.00088937  | 1.000536489 | 1.001242377 | 7.77E-07    |
| DKK1      | 1.002589257 | 1.001451035 | 1.003728773 | 8.13E-06    |
| IL11      | 1.041758872 | 1.023143346 | 1.060713098 | 8.71E-06    |
| FGF12     | 1.041026835 | 1.022738953 | 1.059641727 | 8.73E-06    |
| PSMD11    | 1.008965971 | 1.004875125 | 1.01307347  | 1.66E-05    |
| PSMD2     | 1.003063283 | 1.00166129  | 1.004467239 | 1.82E-05    |
| S100A10   | 1.000408196 | 1.000219462 | 1.000596966 | 2.24E-05    |
| OXTR      | 1.025593997 | 1.01361726  | 1.037712249 | 2.48E-05    |
| STC1      | 1.002750074 | 1.001452173 | 1.004049656 | 3.24E-05    |
| TNFRSF11A | 1.04752233  | 1.024043492 | 1.071539481 | 5.96E-05    |
| RAET1E    | 1.058593257 | 1.029300558 | 1.088719593 | 6.98E-05    |
| F2RL1     | 1.006023103 | 1.003025826 | 1.009029337 | 8.00E-05    |
| SHC1      | 1.002342521 | 1.001168414 | 1.003518006 | 9.13E-05    |
| JAG1      | 1.008479444 | 1.004127216 | 1.012850535 | 0.000129999 |
| HSPA4     | 1.00746943  | 1.003564287 | 1.011389769 | 0.00017298  |
| NRG4      | 1.114748556 | 1.052567125 | 1.180603415 | 0.000207737 |
| SEMA4B    | 1.002219716 | 1.001044929 | 1.003395883 | 0.000211215 |
| PROCR     | 1.003216254 | 1.001474573 | 1.004960964 | 0.000292323 |
| TNFRSF1A  | 1.003859922 | 1.001731425 | 1.005992941 | 0.000374585 |
| NEDD4     | 1.034234829 | 1.015054637 | 1.053777445 | 0.000424331 |
| ADIPOR2   | 1.006658862 | 1.002950277 | 1.010381161 | 0.000424524 |
| INSL4     | 1.004537526 | 1.001976847 | 1.007104749 | 0.000508027 |
| SEMA3C    | 1.005686277 | 1.002460283 | 1.008922652 | 0.000542262 |
| SEMA7A    | 1.005204645 | 1.002240658 | 1.008177398 | 0.000570066 |
| FURIN     | 1.000274807 | 1.000116927 | 1.000432712 | 0.000645531 |
| HLA-DMA   | 0.998216892 | 0.99717926  | 0.999255604 | 0.000770097 |
| FGF2      | 1.06183451  | 1.024823901 | 1.100181725 | 0.000917645 |
| LANCL1    | 1.008411038 | 1.003419448 | 1.013427459 | 0.000938787 |
| HLA-DRA   | 0.999911723 | 0.999859399 | 0.999964049 | 0.000944673 |
| CD74      | 0.999914204 | 0.999862767 | 0.999965642 | 0.00107914  |
| KRAS      | 1.003238917 | 1.001276256 | 1.005205425 | 0.00120993  |
| PSMC5     | 1.007468513 | 1.00292552  | 1.012032084 | 0.00125177  |
| KLRC2     | 1.064142791 | 1.024503192 | 1.105316106 | 0.001328222 |
| HLA-DMB   | 0.994981786 | 0.99192824  | 0.998044733 | 0.001336679 |
| S100A11   | 1.00012738  | 1.000049227 | 1.00020554  | 0.001400375 |

|          |             |             |             |             |
|----------|-------------|-------------|-------------|-------------|
| BTK      | 0.966388275 | 0.946250604 | 0.986954506 | 0.001461899 |
| PAK2     | 1.006983507 | 1.002660292 | 1.011325363 | 0.001523168 |
| HNF4A    | 1.022653919 | 1.008568684 | 1.036935862 | 0.001546919 |
| GHRHR    | 1.34407929  | 1.118104366 | 1.615724964 | 0.001640472 |
| HLA-DPB1 | 0.99934872  | 0.998943234 | 0.99975437  | 0.001653063 |
| HLA-DPA1 | 0.998985105 | 0.9983519   | 0.999618711 | 0.001696258 |
| BIRC5    | 1.005667483 | 1.002098412 | 1.009249265 | 0.001835877 |
| IL1R2    | 1.007483491 | 1.002762298 | 1.012226913 | 0.001864598 |
| HLA-DRB5 | 0.999713054 | 0.999532149 | 0.999893991 | 0.001882856 |
| RAC1     | 1.001291357 | 1.000476725 | 1.002106653 | 0.001885615 |
| BMP7     | 1.008089117 | 1.002979082 | 1.013225187 | 0.001888625 |
| PPIA     | 1.00178008  | 1.000655715 | 1.002905709 | 0.001909196 |
| RARG     | 1.009733796 | 1.003560797 | 1.015944766 | 0.001961316 |
| SLC10A2  | 1.009868656 | 1.003594192 | 1.016182348 | 0.00201363  |
| CRABP1   | 1.000898409 | 1.000328097 | 1.001469047 | 0.00201493  |
| XCR1     | 0.818137731 | 0.718964844 | 0.93099037  | 0.002330193 |
| TAP2     | 1.010280186 | 1.003640681 | 1.016963614 | 0.002364254 |
| LCN15    | 1.017956677 | 1.006261444 | 1.029787838 | 0.002538774 |
| SEMA4G   | 1.014124098 | 1.004876801 | 1.023456493 | 0.002692022 |
| S100P    | 1.000141019 | 1.000048788 | 1.000233258 | 0.002728228 |
| BDNF     | 1.060093826 | 1.020277834 | 1.101463623 | 0.002810376 |
| LTBR     | 1.004017295 | 1.001379231 | 1.006662309 | 0.002819805 |
| ACTG1    | 1.000113283 | 1.000038201 | 1.000188371 | 0.003104166 |
| CD40LG   | 0.927384682 | 0.882180162 | 0.974905563 | 0.003108941 |
| FCGRT    | 0.996713573 | 0.994525204 | 0.998906758 | 0.003331767 |
| SOD1     | 1.001329362 | 1.000435752 | 1.00222377  | 0.003541674 |
| CBLC     | 1.004057401 | 1.001313554 | 1.006808767 | 0.003729795 |
| INHA     | 1.002287322 | 1.000729671 | 1.003847397 | 0.003987541 |
| HLA-DOB  | 0.982315054 | 0.970383495 | 0.99439332  | 0.004213829 |
| HLA-DRB1 | 0.999865275 | 0.999772776 | 0.999957783 | 0.004312274 |
| CX3CR1   | 0.954925855 | 0.925147027 | 0.985663209 | 0.004326274 |
| OAS1     | 1.002268062 | 1.000700288 | 1.003838293 | 0.004562155 |
| HLA-DQA1 | 0.998073274 | 0.996740557 | 0.999407774 | 0.004670525 |
| FGF8     | 1.170140581 | 1.048800249 | 1.305519313 | 0.004908394 |
| UCN2     | 1.039471936 | 1.011596    | 1.068116032 | 0.005250686 |
| ADRB2    | 0.953085058 | 0.921287093 | 0.985980521 | 0.005512203 |
| CAT      | 0.996060677 | 0.993279152 | 0.998849991 | 0.005667083 |
| IL20RB   | 1.00560462  | 1.001604132 | 1.009621086 | 0.005994568 |
| VIPR1    | 0.964629235 | 0.940001089 | 0.989902642 | 0.006351448 |
| PPARG    | 1.009616056 | 1.00269322  | 1.016586689 | 0.006408451 |
| CACYBP   | 1.005825525 | 1.001624554 | 1.010044116 | 0.006526126 |
| MAP2K1   | 1.007525056 | 1.002051615 | 1.013028394 | 0.006988774 |
| HSP90AA1 | 1.000465858 | 1.000125426 | 1.000806405 | 0.007312931 |
| NTS      | 1.000093528 | 1.000025073 | 1.000161987 | 0.007409125 |
| CCR6     | 0.500681807 | 0.300946225 | 0.832980283 | 0.007731127 |
| BMP1     | 1.012224622 | 1.003141177 | 1.021390318 | 0.008244777 |
| CD1D     | 0.947953729 | 0.91109605  | 0.986302457 | 0.008251321 |
| MC1R     | 1.05732986  | 1.013766049 | 1.102765706 | 0.00940815  |
| HSPA2    | 1.00792399  | 1.001933698 | 1.013950096 | 0.009454869 |
| NRAS     | 1.004810181 | 1.001167459 | 1.008466158 | 0.009608099 |
| TPM2     | 1.002167637 | 1.000524508 | 1.003813463 | 0.009701574 |

|          |             |             |             |             |
|----------|-------------|-------------|-------------|-------------|
| IL16     | 0.96075099  | 0.931927585 | 0.990465868 | 0.009984007 |
| TLR2     | 0.993838694 | 0.989156733 | 0.998542817 | 0.010310931 |
| HLA-DOA  | 0.9961173   | 0.993159555 | 0.999083854 | 0.010345162 |
| CMTM7    | 0.985767866 | 0.97491165  | 0.996744972 | 0.011180636 |
| PIK3CG   | 0.957391345 | 0.925666897 | 0.990203052 | 0.011322222 |
| IGF1R    | 1.008239367 | 1.001843219 | 1.014676351 | 0.011500796 |
| CIITA    | 0.981001585 | 0.966400223 | 0.99582356  | 0.012177331 |
| PLXNA4   | 1.061173747 | 1.013023987 | 1.1116121   | 0.012205965 |
| ITGAL    | 0.987939282 | 0.978592609 | 0.997375227 | 0.012354055 |
| QRFP     | 1.226930487 | 1.045158512 | 1.440315896 | 0.012424653 |
| CRP      | 1.016497123 | 1.003508965 | 1.029653384 | 0.012637169 |
| GMFG     | 0.994178462 | 0.989595085 | 0.998783067 | 0.013269783 |
| PAK1     | 1.006618189 | 1.001361898 | 1.011902071 | 0.013531472 |
| RAET1G   | 1.028179205 | 1.005739711 | 1.051119357 | 0.013574903 |
| SCGB3A1  | 0.999902615 | 0.99982526  | 0.999979977 | 0.013616233 |
| PTPN6    | 0.990141298 | 0.982354017 | 0.99799031  | 0.013919984 |
| RELB     | 1.008947823 | 1.001786645 | 1.016160192 | 0.014240462 |
| LGR4     | 1.003954878 | 1.000787251 | 1.007132531 | 0.014363701 |
| PTGDS    | 0.997816979 | 0.996069085 | 0.99956794  | 0.014562977 |
| TLR7     | 0.951294562 | 0.913865638 | 0.990256452 | 0.014766547 |
| CCL3L3   | 0.962177019 | 0.932739829 | 0.992543244 | 0.015012281 |
| PLSCR1   | 1.003536288 | 1.000673846 | 1.006406919 | 0.015428008 |
| IL1RAP   | 1.021889676 | 1.004046858 | 1.040049577 | 0.015981398 |
| TAP1     | 1.001176527 | 1.000207848 | 1.002146144 | 0.017277042 |
| SFTPA2   | 0.999969017 | 0.999943474 | 0.99999456  | 0.017437083 |
| TNFSF12  | 0.991236087 | 0.984030363 | 0.998494575 | 0.018045658 |
| IL2      | 0.493081387 | 0.273637419 | 0.888508799 | 0.018602102 |
| IL33     | 0.992857086 | 0.986944299 | 0.998805297 | 0.018661917 |
| EGFR     | 1.00148392  | 1.000237415 | 1.002731977 | 0.01961955  |
| PTPRC    | 0.993810434 | 0.988625843 | 0.999022213 | 0.01999001  |
| TNFRSF17 | 0.986671018 | 0.975521083 | 0.997948393 | 0.020659891 |
| VAV2     | 1.006928932 | 1.001045754 | 1.012846685 | 0.020912554 |
| ARRB1    | 0.991309076 | 0.98395458  | 0.998718543 | 0.021592452 |
| TNFSF13  | 0.989370641 | 0.980372119 | 0.998451757 | 0.021886059 |
| SFTPA1   | 0.999963452 | 0.999932188 | 0.999994718 | 0.021960274 |
| CSF2RB   | 0.987057233 | 0.976107616 | 0.998129678 | 0.022085923 |
| DDX58    | 1.005711695 | 1.000811235 | 1.01063615  | 0.022292481 |
| IL22RA1  | 1.00694326  | 1.000975171 | 1.012946932 | 0.022529059 |
| RARB     | 1.026576322 | 1.003449755 | 1.050235889 | 0.024058445 |
| SEMA4A   | 0.988797817 | 0.979156004 | 0.998534573 | 0.024240744 |
| PRLR     | 1.021307753 | 1.002732427 | 1.040227182 | 0.024364404 |
| A2M      | 0.999634033 | 0.999315411 | 0.999952757 | 0.024421688 |
| FGR      | 0.989039681 | 0.979546081 | 0.998625291 | 0.025122982 |
| NR2F2    | 1.005021365 | 1.000623533 | 1.009438526 | 0.025185304 |
| PRKCA    | 1.010680201 | 1.001259884 | 1.020189149 | 0.02618286  |
| PIK3CD   | 0.984609787 | 0.971234118 | 0.998169663 | 0.026250756 |
| NOD1     | 0.980113781 | 0.962862539 | 0.997674107 | 0.026624903 |
| CTSG     | 0.959474749 | 0.924984436 | 0.995251118 | 0.026772866 |
| ABCC4    | 0.988831921 | 0.97902658  | 0.998735466 | 0.027187059 |
| TNFSF14  | 1.046363947 | 1.005051488 | 1.089374548 | 0.027445118 |
| AGER     | 0.99892292  | 0.997961447 | 0.99988532  | 0.0282794   |

|           |             |             |             |             |
|-----------|-------------|-------------|-------------|-------------|
| EPGN      | 1.014731307 | 1.001553269 | 1.028082736 | 0.028330585 |
| IL5RA     | 0.88811805  | 0.798721174 | 0.987520671 | 0.028382506 |
| HSPA1A    | 1.001154118 | 1.000118848 | 1.00219046  | 0.028881805 |
| S100A2    | 1.000299475 | 1.000030323 | 1.000568698 | 0.029197433 |
| CTF1      | 0.988959883 | 0.979125599 | 0.998892943 | 0.029465852 |
| PPARD     | 1.005446818 | 1.000540354 | 1.010377342 | 0.029525053 |
| NOX1      | 1.023150095 | 1.00223532  | 1.044501323 | 0.029866622 |
| CD1E      | 0.979488034 | 0.961307263 | 0.99801265  | 0.030153561 |
| ANGPTL5   | 0.532063328 | 0.300316859 | 0.942642334 | 0.030588199 |
| CD81      | 0.99845445  | 0.997052816 | 0.999858055 | 0.030926338 |
| LIFR      | 0.988952045 | 0.979004523 | 0.999000643 | 0.031255226 |
| PML       | 1.009150802 | 1.000765788 | 1.017606071 | 0.032372415 |
| IL6R      | 0.992248326 | 0.985163734 | 0.999383866 | 0.033291963 |
| TNFRSF10C | 0.981358281 | 0.964479512 | 0.998532435 | 0.033513226 |
| CD1B      | 0.957582301 | 0.920039364 | 0.996657206 | 0.033665806 |
| SEMA3A    | 1.007631909 | 1.000586557 | 1.014726868 | 0.033690077 |
| PAK4      | 1.007328565 | 1.000557834 | 1.014145114 | 0.033834845 |
| CCL14     | 0.90637875  | 0.827682813 | 0.992557082 | 0.033907027 |
| GNAI1     | 1.007904137 | 1.000594565 | 1.015267108 | 0.034004548 |
| NFATC1    | 0.956681065 | 0.918150114 | 0.996829001 | 0.03473897  |
| AVPR1B    | 1.257419254 | 1.015610334 | 1.556800997 | 0.035543238 |
| ARG2      | 0.982554534 | 0.966517874 | 0.998857278 | 0.036069476 |
| IL15RA    | 1.011616851 | 1.000743095 | 1.022608759 | 0.036199353 |
| GDF10     | 0.973148863 | 0.948621754 | 0.998310133 | 0.036633777 |
| RFXANK    | 0.992815789 | 0.986106408 | 0.99957082  | 0.03715634  |
| CCL17     | 0.994707631 | 0.989751469 | 0.999688612 | 0.03732717  |
| CMTM5     | 0.146928914 | 0.024009569 | 0.899145927 | 0.037987747 |
| CD1C      | 0.990209144 | 0.981027455 | 0.999476768 | 0.038445122 |
| TRIM22    | 0.994639641 | 0.989589468 | 0.999715586 | 0.038500163 |
| UCN3      | 1.000378064 | 1.000019146 | 1.00073711  | 0.038967029 |
| SHC3      | 0.951965766 | 0.908477631 | 0.997535645 | 0.03907573  |
| RBP2      | 1.011611614 | 1.000573687 | 1.022771307 | 0.039167602 |
| MAP3K8    | 0.986007614 | 0.972820448 | 0.999373541 | 0.040249128 |
| CCL23     | 0.970879537 | 0.943736804 | 0.998802919 | 0.041076365 |
| CHP2      | 1.032017437 | 1.001264762 | 1.063714645 | 0.041165958 |
| FLT3      | 0.84465268  | 0.717977598 | 0.993677452 | 0.041703144 |
| LGR5      | 1.005766459 | 1.000211612 | 1.011352157 | 0.041866579 |
| STAT1     | 1.000732295 | 1.000026478 | 1.001438611 | 0.042000289 |
| OSTN      | 1.25595754  | 1.00813225  | 1.564704771 | 0.042134767 |
| PLCG2     | 0.967683004 | 0.937483286 | 0.998855564 | 0.042280287 |
| GMFB      | 1.007654714 | 1.000242413 | 1.015121944 | 0.042938488 |
| IL17RD    | 1.021838811 | 1.00062888  | 1.043498321 | 0.043517411 |
| NR3C2     | 0.977897649 | 0.956901159 | 0.999354848 | 0.043566233 |
| TGFB2     | 1.010431258 | 1.000283921 | 1.020681534 | 0.043895324 |
| TLR8      | 0.973165851 | 0.947739342 | 0.999274517 | 0.044041933 |
| VIPR2     | 1.054596248 | 1.001280221 | 1.110751239 | 0.044611465 |
| FGA       | 1.000069554 | 1.000001668 | 1.000137446 | 0.044630856 |
| CCL21     | 1.000316572 | 1.000007206 | 1.000626033 | 0.044896079 |
| PSME3     | 1.003463185 | 1.000077438 | 1.006860395 | 0.044977025 |
| ICOS      | 0.954248379 | 0.911488212 | 0.99901453  | 0.045272341 |
| KL        | 0.94193185  | 0.888346245 | 0.998749773 | 0.045303413 |

|          |             |             |             |             |
|----------|-------------|-------------|-------------|-------------|
| NR1H4    | 1.041092274 | 1.000701411 | 1.083113416 | 0.046076219 |
| CCR4     | 0.971885391 | 0.944945255 | 0.999593583 | 0.04677784  |
| PLXND1   | 0.996826931 | 0.993704931 | 0.999958741 | 0.04706174  |
| PSMC1    | 1.010802235 | 1.000132105 | 1.021586201 | 0.047215633 |
| PRTN3    | 1.111148769 | 1.001178981 | 1.233197669 | 0.047465397 |
| TYROBP   | 0.999328522 | 0.998664526 | 0.999992961 | 0.047622528 |
| CD79A    | 0.998311425 | 0.99664124  | 0.999984409 | 0.047904527 |
| PSMC4    | 1.001671236 | 1.000008835 | 1.0033364   | 0.048793733 |
| PSMD7    | 1.003671285 | 1.000013255 | 1.007342697 | 0.049174104 |
| SERPIND1 | 0.996518426 | 0.993056388 | 0.999992534 | 0.049510504 |
| NMB      | 1.002904101 | 1.000004621 | 1.005811988 | 0.049635498 |
| SFTPD    | 0.999806071 | 0.999612405 | 0.999999776 | 0.049735284 |
| PLXNA2   | 0.989577185 | 0.979267196 | 0.99999572  | 0.049906449 |
| FGFR1    | 1.002378114 | 1.000000229 | 1.004761655 | 0.049977961 |
